# Supplementary material for: Generation of human long-lived plasma cells by developmentally regulated epigenetic imprinting
Source: Life Sci Alliance. 2021 Dec 24;5(3):e202101285. doi: 10.26508/lsa.202101285 (PMC8739272; doi:10.26508/lsa.202101285)
Supplement: Supplementary file 1 [file LSA-2021-01285_TableS1.xlsx]

## Sheet: Sheet1
Figure	Compartment	Subject ID	Age	Gender	Race	Ethnicity
1a	Blood	103	31	M	Asian	Non Hispanic
1a	Blood	1544	55	F	Unavailable	Unavailable
1a	Blood	1842	22	F	African American	Non Hispanic
1a	Blood	2052	46	F	African American	Non Hispanic
1a	Bone Marrow	1534	55	F	Unavailable	Unavailable
1a	Bone Marrow	1535	40	F	Unavailable	Unavailable
1a	Bone Marrow	1536	55	F	Unavailable	Unavailable
1a	Bone Marrow	1543	60	F	Unavailable	Unavailable
1a	Blood	2054	42	F	African American	Non Hispanic
1a	Bone Marrow	1544	40	F	Caucasian	Non Hispanic
1a	Bone Marrow	1595	50	F	African American	Non Hispanic
1a	Bone Marrow	1555	56	M	Caucasian	Non Hispanic
1a	Bone Marrow	1548	36	F	African American	Non Hispanic
1a	Blood	2452	22	F	Caucasian	Non Hispanic
1a, 5a, 5c	Blood	2572	19	F	Asian	Non Hispanic
1a, 5a, 5c	Blood	2560	33	F	Caucasian	Non Hispanic
1a, 5a, 5c, 5f, 5g, 5h	Blood	2574	19	M	Asian	Non Hispanic
1a, 5a, 5c, 5f, 5g, 5h	Blood	2576	19	F	Asian	Non Hispanic
2, 3, 4a, 4b, 4c, 4d, 4e, 4f	Blood and Bone Marrow	1895	19	M	Caucasian	Hispanic
2, 3, 4a, 4b, 4c, 4d, 4e, 4f	Blood	2265	22	F	Caucasian	Non-Hispanic
2, 3, 4a, 4b, 4c, 4d, 4e, 4f	Blood	2266	25	F	Caucasian	Non-Hispanic
2, 3, 4a, 4b, 4c, 4d, 4e, 4f	Blood	2267	23	F	Asian	Non-Hispanic
2, 3, 4a, 4b, 4c, 4d, 4e, 4f	Blood	2272	18	F	Asian	Non-Hispanic
2, 3, 4a, 4b, 4c, 4d, 4e, 4f	Blood	2273	18	F	Asian	Non-Hispanic
2, 3, 4a, 4b, 4c, 4d, 4e, 4f	Blood and Bone Marrow	2206	26	M	Caucasian	Non-Hispanic
2, 3, 4a, 4b, 4e, 4f	Bone Marrow	1464	27	F	AA	Non-Hispanic
2, 3, 4a, 4b, 4e, 4f	Bone Marrow	1177	48	F	Caucasian	Non-Hispanic
2, 3, 4a, 4b, 4e, 4f	Bone Marrow	2308	21	F	AA	Non-Hispanic
2, 3, 4a, 4b, 4e, 4f	Bone Marrow	2252	43	M	Caucasian	Not Indicated
2, 3, 4a, 4b, 4e, 4f	Bone Marrow	2311	24	M	Caucasian	Non-Hispanic
2, 3, 4a, 4b, 4e, 4f	Bone Marrow	1577	31	F	Caucasian	Non-Hispanic
2, 3, 4a, 4b, 4e, 4f	Bone Marrow	2314	20	F	AA	Non-Hispanic
2, 3, 4a, 4b, 4e, 4f	Bone Marrow	2321	22	F	Caucasian	Non-Hispanic
2, 3, 4a, 4b, 4e, 4f	Bone Marrow	800	54	M	Caucasian	Non-Hispanic
2, 3e, 4a, 4b, 4e	Blood	2277	19	F	Asian	Non-Hispanic
2, 3e, 4a, 4b, 4e	Blood	2281	18	F	AA	Non-Hispanic
2, 3e, 4a, 4b, 4e	Blood	2282	18	F	Asian	Non-Hispanic
2, 3e, 4a, 4b, 4e	Blood	2283	18	F	Asian	Non-Hispanic
4h	Bone Marrow	236	36	F	Caucasian	Non Hispanic
4h	Bone Marrow	3420	20	F	AA	Non-Hispanic
4h	Bone Marrow	3421	23	F	Caucasian	Non-Hispanic
4h	Blood	2616	63	F	Caucasian	Non Hispanic
5b	Blood	1177	48	F	Caucasian	Non Hispanic
5b	Blood	2259	34	F	Caucasian	Non Hispanic
5f, 5g, 5h, 5k, 5l, 5m, 5n	Blood	2566	18	M	Asian	Non Hispanic
5f, 5g, 5h, 5k, 5l, 5m, 5n	Blood	2568	19	M	Asian	Non Hispanic
5f, 5g, 5h, 5k, 5l, 5m, 5n	Blood	2573	19	F	Asian	Non Hispanic
5f, 5g, 5h, 5k, 5l, 5m, 5n	Blood	2577	18	M	Asian	Non Hispanic
5f, 5g, 5h, 5k, 5l, 5m, 5n	Blood	2578	24	F	Asian	Non Hispanic
5f, 5g, 5h, 5k, 5l, 5m, 5n	Blood	2580	18	F	Asian	Non Hispanic
5f, 5g, 5h, 5k, 5l, 5m, 5n	Blood	2581	18	F	Asian	Non Hispanic
5f, 5g, 5h, 5k, 5l, 5m, 5n	Blood	2585	20	F	AA	Non Hispanic
5f, 5g, 5h, 5k, 5l, 5m, 5n	Blood	2588	22	F	AA	Non Hispanic
5f, 5g, 5h, 5k, 5l, 5m, 5n	Blood	2598	30	F	Caucasian	Non Hispanic
5f, 5g, 5h, 5k, 5l, 5m, 5n	Blood	2665	26	M	Asian	Non Hispanic
5f, 5g, 5h, 5k, 5l, 5m, 5n	Blood	2667	21	F	AA+Caucasian	Non Hispanic
5i, 5j, 5k, 5l, 5m, 5n	Blood	101	57	F	Asian	Non Hispanic
5i, 5j, 5k, 5l, 5m, 5n	Blood	101	57	F	Asian	Non Hispanic
5i, 5j, 5k, 5l, 5m, 5n	Blood	1681	29	M	Caucasian	Non Hispanic
6	Bone Marrow	503	61	F	Caucasian	Non Hispanic
6	Bone Marrow	074-785	33	F	Caucasian	Non Hispanic
6	Bone Marrow	199-309	56	F	Caucasian	Non Hispanic
6	Bone Marrow	266-1319	57	F	Caucasian	Non Hispanic
6	Bone Marrow	275-785	38	M	AA	Non Hispanic
6	Bone Marrow	301-503	63	F	Caucasian	Non Hispanic
6	Bone Marrow	343-1319	39	M	AA	Non Hispanic
6	Bone Marrow	374-309	59	F	Caucasian	Non Hispanic

## Sheet: Blood
Figure	Compartment	Subject ID	Age	Gender	Race	Ethnicity
1a	Blood	103	31	M	Asian	Non Hispanic
1a	Blood	1544	55	F	Unavailable	Unavailable
1a	Blood	1842	22	F	African American	Non Hispanic
1a	Blood	2052	46	F	African American	Non Hispanic
1a	Blood	2054	42	F	African American	Non Hispanic
1a	Blood	2452	22	F	Caucasian	Non Hispanic
1a, 5a, 5c	Blood	2572	19	F	Asian	Non Hispanic
1a, 5a, 5c	Blood	2560	33	F	Caucasian	Non Hispanic
1a, 5a, 5c, 5f, 5g, 5h	Blood	2574	19	M	Asian	Non Hispanic
1a, 5a, 5c, 5f, 5g, 5h	Blood	2576	19	F	Asian	Non Hispanic
2, 3, 4a, 4b, 4c, 4d, 4e, 4f	Blood and Bone Marrow	1895	19	M	Caucasian	Hispanic
2, 3, 4a, 4b, 4c, 4d, 4e, 4f	Blood	2265	22	F	Caucasian	Non-Hispanic
2, 3, 4a, 4b, 4c, 4d, 4e, 4f	Blood	2266	25	F	Caucasian	Non-Hispanic
2, 3, 4a, 4b, 4c, 4d, 4e, 4f	Blood	2267	23	F	Asian	Non-Hispanic
2, 3, 4a, 4b, 4c, 4d, 4e, 4f	Blood	2272	18	F	Asian	Non-Hispanic
2, 3, 4a, 4b, 4c, 4d, 4e, 4f	Blood	2273	18	F	Asian	Non-Hispanic
2, 3, 4a, 4b, 4c, 4d, 4e, 4f	Blood and Bone Marrow	2206	26	M	Caucasian	Non-Hispanic
2, 3e, 4a, 4b, 4e	Blood	2277	19	F	Asian	Non-Hispanic
2, 3e, 4a, 4b, 4e	Blood	2281	18	F	AA	Non-Hispanic
2, 3e, 4a, 4b, 4e	Blood	2282	18	F	Asian	Non-Hispanic
2, 3e, 4a, 4b, 4e	Blood	2283	18	F	Asian	Non-Hispanic
4h	Blood	2616	63	F	Caucasian	Non Hispanic
5b	Blood	1177	48	F	Caucasian	Non Hispanic
5b	Blood	2259	34	F	Caucasian	Non Hispanic
5f, 5g, 5h, 5k, 5l, 5m, 5n	Blood	2566	18	M	Asian	Non Hispanic
5f, 5g, 5h, 5k, 5l, 5m, 5n	Blood	2568	19	M	Asian	Non Hispanic
5f, 5g, 5h, 5k, 5l, 5m, 5n	Blood	2573	19	F	Asian	Non Hispanic
5f, 5g, 5h, 5k, 5l, 5m, 5n	Blood	2577	18	M	Asian	Non Hispanic
5f, 5g, 5h, 5k, 5l, 5m, 5n	Blood	2578	24	F	Asian	Non Hispanic
5f, 5g, 5h, 5k, 5l, 5m, 5n	Blood	2580	18	F	Asian	Non Hispanic
5f, 5g, 5h, 5k, 5l, 5m, 5n	Blood	2581	18	F	Asian	Non Hispanic
5f, 5g, 5h, 5k, 5l, 5m, 5n	Blood	2585	20	F	AA	Non Hispanic
5f, 5g, 5h, 5k, 5l, 5m, 5n	Blood	2588	22	F	AA	Non Hispanic
5f, 5g, 5h, 5k, 5l, 5m, 5n	Blood	2598	30	F	Caucasian	Non Hispanic
5f, 5g, 5h, 5k, 5l, 5m, 5n	Blood	2665	26	M	Asian	Non Hispanic
5f, 5g, 5h, 5k, 5l, 5m, 5n	Blood	2667	21	F	AA+Caucasian	Non Hispanic
5i, 5j, 5k, 5l, 5m, 5n	Blood	101	57	F	Asian	Non Hispanic
5i, 5j, 5k, 5l, 5m, 5n	Blood	101	57	F	Asian	Non Hispanic
5i, 5j, 5k, 5l, 5m, 5n	Blood	1681	29	M	Caucasian	Non Hispanic

## Sheet: BM
Figure	Compartment	Subject ID	Age	Gender	Race	Ethnicity
1a	Bone Marrow	1534	55	F	Unavailable	Unavailable
1a	Bone Marrow	1535	40	F	Unavailable	Unavailable
1a	Bone Marrow	1536	55	F	Unavailable	Unavailable
1a	Bone Marrow	1543	60	F	Unavailable	Unavailable
1a	Bone Marrow	1544	40	F	Caucasian	Non Hispanic
1a	Bone Marrow	1595	50	F	African American	Non Hispanic
1a	Bone Marrow	1555	56	M	Caucasian	Non Hispanic
1a	Bone Marrow	1548	36	F	African American	Non Hispanic
2, 3, 4a, 4b, 4c, 4d, 4e, 4f	Blood and Bone Marrow	1895	19	M	Caucasian	Hispanic
2, 3, 4a, 4b, 4c, 4d, 4e, 4f	Blood and Bone Marrow	2206	26	M	Caucasian	Non-Hispanic
2, 3, 4a, 4b, 4e, 4f	Bone Marrow	1464	27	F	AA	Non-Hispanic
2, 3, 4a, 4b, 4e, 4f	Bone Marrow	1177	48	F	Caucasian	Non-Hispanic
2, 3, 4a, 4b, 4e, 4f	Bone Marrow	2308	21	F	AA	Non-Hispanic
2, 3, 4a, 4b, 4e, 4f	Bone Marrow	2252	43	M	Caucasian	Not Indicated
2, 3, 4a, 4b, 4e, 4f	Bone Marrow	2311	24	M	Caucasian	Non-Hispanic
2, 3, 4a, 4b, 4e, 4f	Bone Marrow	1577	31	F	Caucasian	Non-Hispanic
2, 3, 4a, 4b, 4e, 4f	Bone Marrow	2314	20	F	AA	Non-Hispanic
2, 3, 4a, 4b, 4e, 4f	Bone Marrow	2321	22	F	Caucasian	Non-Hispanic
2, 3, 4a, 4b, 4e, 4f	Bone Marrow	800	54	M	Caucasian	Non-Hispanic
4h	Bone Marrow	236	36	F	Caucasian	Non Hispanic
4h	Bone Marrow	3420	20	F	AA	Non-Hispanic
4h	Bone Marrow	3421	23	F	Caucasian	Non-Hispanic
6	Bone Marrow	503	61	F	Caucasian	Non Hispanic
6	Bone Marrow	074-785	33	F	Caucasian	Non Hispanic
6	Bone Marrow	199-309	56	F	Caucasian	Non Hispanic
6	Bone Marrow	266-1319	57	F	Caucasian	Non Hispanic
6	Bone Marrow	275-785	38	M	AA	Non Hispanic
6	Bone Marrow	301-503	63	F	Caucasian	Non Hispanic
6	Bone Marrow	343-1319	39	M	AA	Non Hispanic
6	Bone Marrow	374-309	59	F	Caucasian	Non Hispanic
